# Supplementary material for: From α-NaMnO2to crystal water containing Na-birnessite: enhanced cycling stability for sodium-ion batteries
Source: Royal Society of Chemistry journal article supplement (doi:10.1039/c6ce00191b), 2016-01-01
Supplement: c6ce00191b1.pdf [file c6ce00191b1.pdf]

## Supporting Information

### From $\alpha$ - $\text{NaMnO}_2$ to Crystal Water Containing Na-birnessite:

### Enhanced Cycling Stability for Sodium-ion Batteries

Yanyang Li,<sup>a</sup> Weihua Chen,<sup>a,\*</sup> Shizhong Cui,<sup>b</sup> Xiangming Feng,<sup>a</sup> Zhen Li,<sup>a</sup> Qiuzhi Shi,<sup>a</sup> and Liwei Mi<sup>b,\*</sup>

<sup>†</sup> College of Chemistry and Molecular Engineering, Zhengzhou University, Zhengzhou, 450001, P. R. China

<sup>‡</sup> Center for Advanced Materials Research, Zhongyuan University of Technology, Zhengzhou, 450007, P. R. China

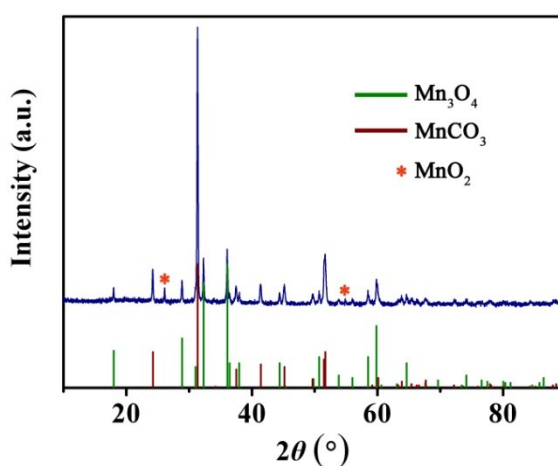

Fig. S1 The XRD pattern of  $\text{MnCO}_3$  obtained by hydrothermal method.

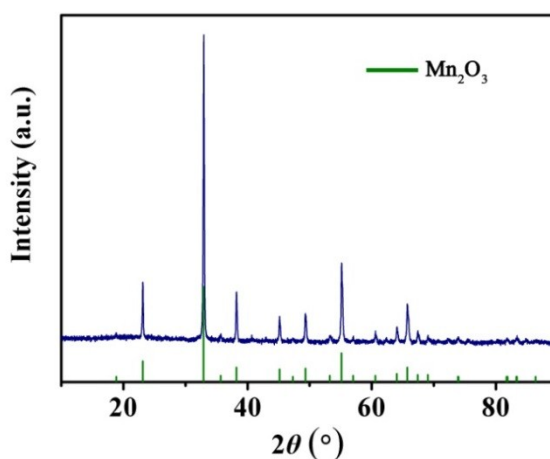

Fig. S2 The XRD pattern of  $\text{Mn}_2\text{O}_3$  obtained from  $\text{MnCO}_3$ .

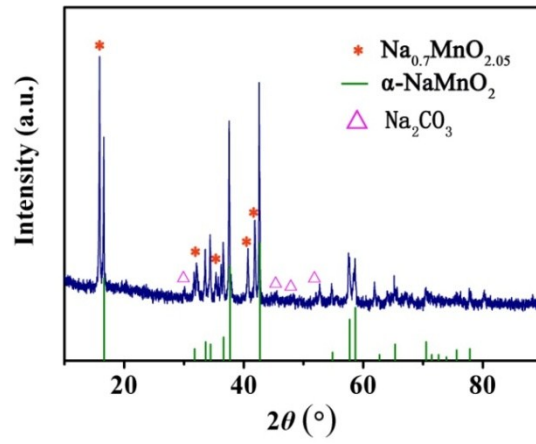

Fig. S3 The XRD pattern of M700.

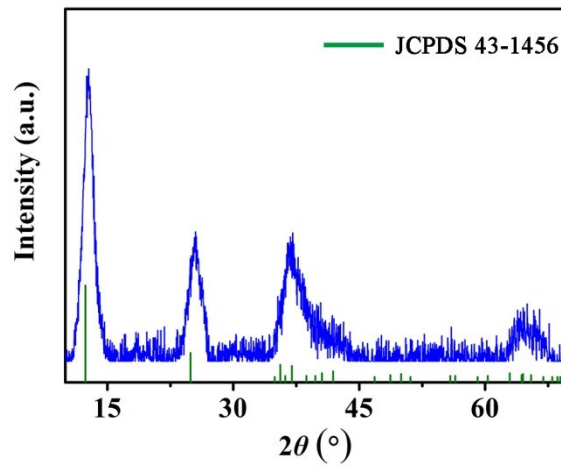

Fig. S4 The XRD pattern of Na-birnessite obtained by oxidation method.

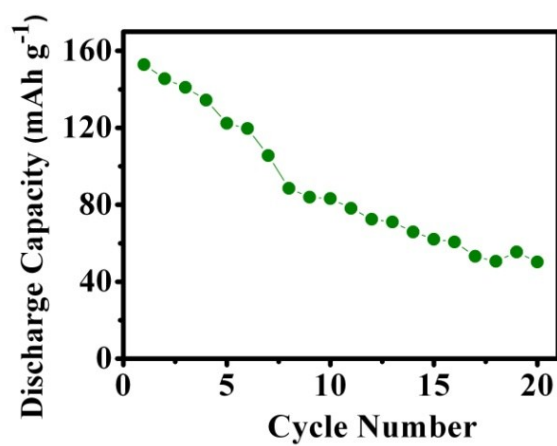

Fig. S5 The cyclic performance between 1.0 and 4.5 V (vs.  $\text{Na}^+/\text{Na}$ ) of MW.

Table S1 The ICP results of Na-birnessite.

| Sample        | Na    | Mn   |
|---------------|-------|------|
| Na-birnessite | 0.274 | 1.00 |

Table S2 The content of Mn<sup>3+</sup> and Mn<sup>4+</sup> in  $\alpha$ -NaMnO<sub>2</sub> and Na-birnessite.

| Sample                       | Content (%)      |                  |
|------------------------------|------------------|------------------|
|                              | Mn <sup>3+</sup> | Mn <sup>4+</sup> |
| $\alpha$ -NaMnO <sub>2</sub> | 60.14%           | 39.86%           |
| Na-birnessite                | 10.22%           | 89.78%           |

Table S3 The energy density only based on the cathode materials.

| Sample                                                                                     | Charge/Discharge current density (mAh g <sup>-1</sup> ) | Gravimetric Density (Wh kg <sup>-1</sup> ) | Energy | References |
|--------------------------------------------------------------------------------------------|---------------------------------------------------------|--------------------------------------------|--------|------------|
| NaMnO <sub>2</sub>                                                                         | 10                                                      | 327                                        |        | This work  |
| Na-birnessite                                                                              | 10                                                      | 284 (2-3.8 V)                              |        | This work  |
|                                                                                            | 20                                                      | 393 (1-4.5V)                               |        | This work  |
| Na <sub>0.85</sub> Li <sub>0.17</sub> Ni <sub>0.21</sub> Mn <sub>0.64</sub> O <sub>2</sub> | 15                                                      | 323                                        |        | 6          |
| Na <sub>0.44</sub> MnO <sub>2</sub>                                                        | 12.2                                                    | 224                                        |        | 7, 8       |
| P2-Na <sub>2/3</sub> Fe <sub>1/2</sub> Mn <sub>1/2</sub> O <sub>2</sub>                    | 12                                                      | 523                                        |        | 7, 9       |
| O3-NaFe <sub>1/2</sub> Mn <sub>1/2</sub> O <sub>2</sub>                                    | 12                                                      | 303                                        |        | 7, 9       |
| NaFePO <sub>4</sub>                                                                        | 7.5                                                     | 338                                        |        | 7, 10      |
| Na <sub>3</sub> V <sub>2</sub> (PO <sub>4</sub> ) <sub>3</sub>                             | 11.7                                                    | 316                                        |        | 7,11       |
| Na <sub>2/3</sub> Cu <sub>0.33</sub> Mn <sub>0.67</sub> O <sub>2</sub>                     | 10                                                      | 281                                        |        | 12         |
| Na <sub>2/3</sub> Cu <sub>0.14</sub> Mn <sub>0.86</sub> O <sub>2</sub>                     | 10                                                      | 391                                        |        | 12         |
